# Supplementary material for: ANTHRACNOSE RESISTANCE GENE2 confers fungal resistance in sorghum
Source: PubMed Central journal article supplement — Plant J. 2022 Dec 18;113(2):308–26. doi: 10.1111/tpj.16048 (PMC10108161; doi:10.1111/tpj.16048), 2022-12-18

**Figure S1**

**(a) TAM428**

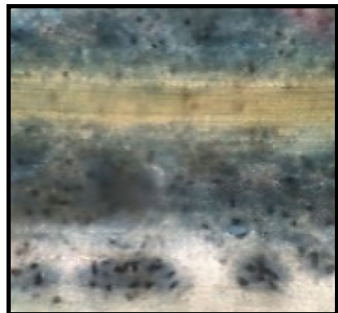

**SC328C**

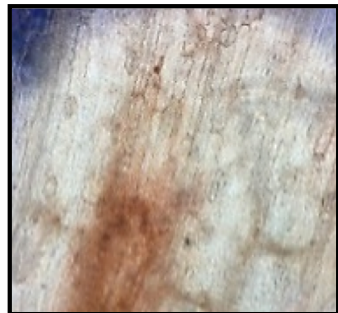

**(b)**

**BTx623**

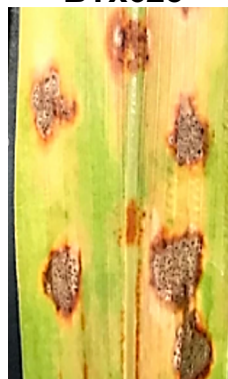

**SC328C**

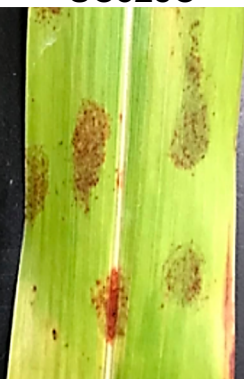

**SC748**

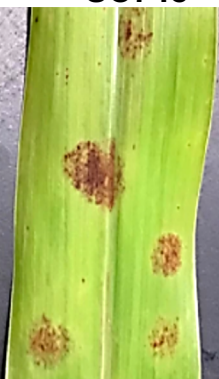

**(c)**

**ARG2\_NIL\_rr**

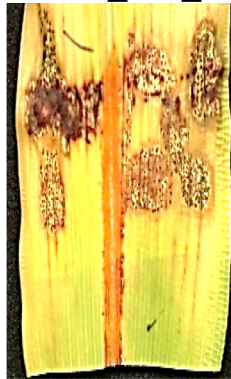

**ARG2\_NIL\_RR**

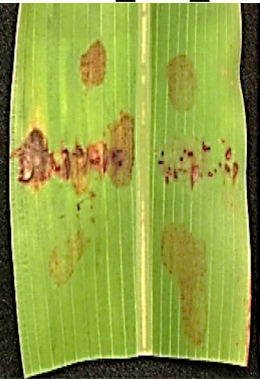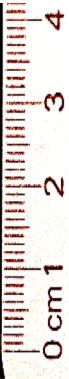

Figure S2

(a)

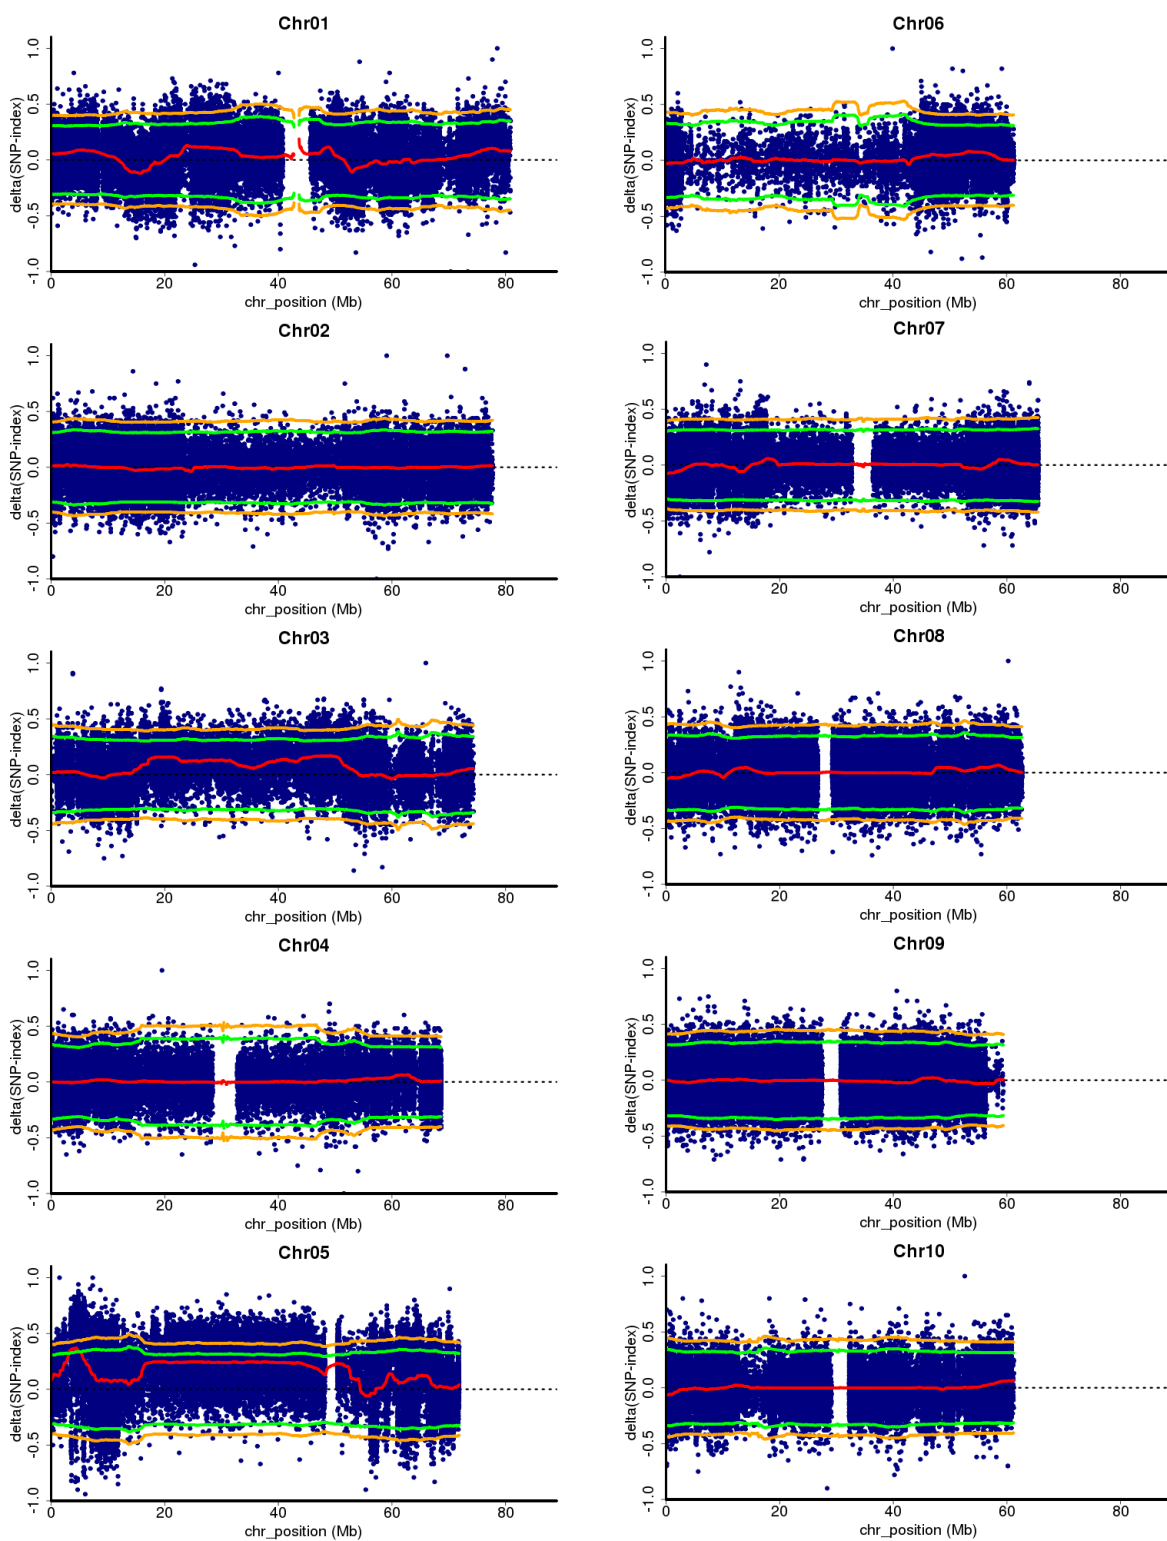

Figure S2

(b)

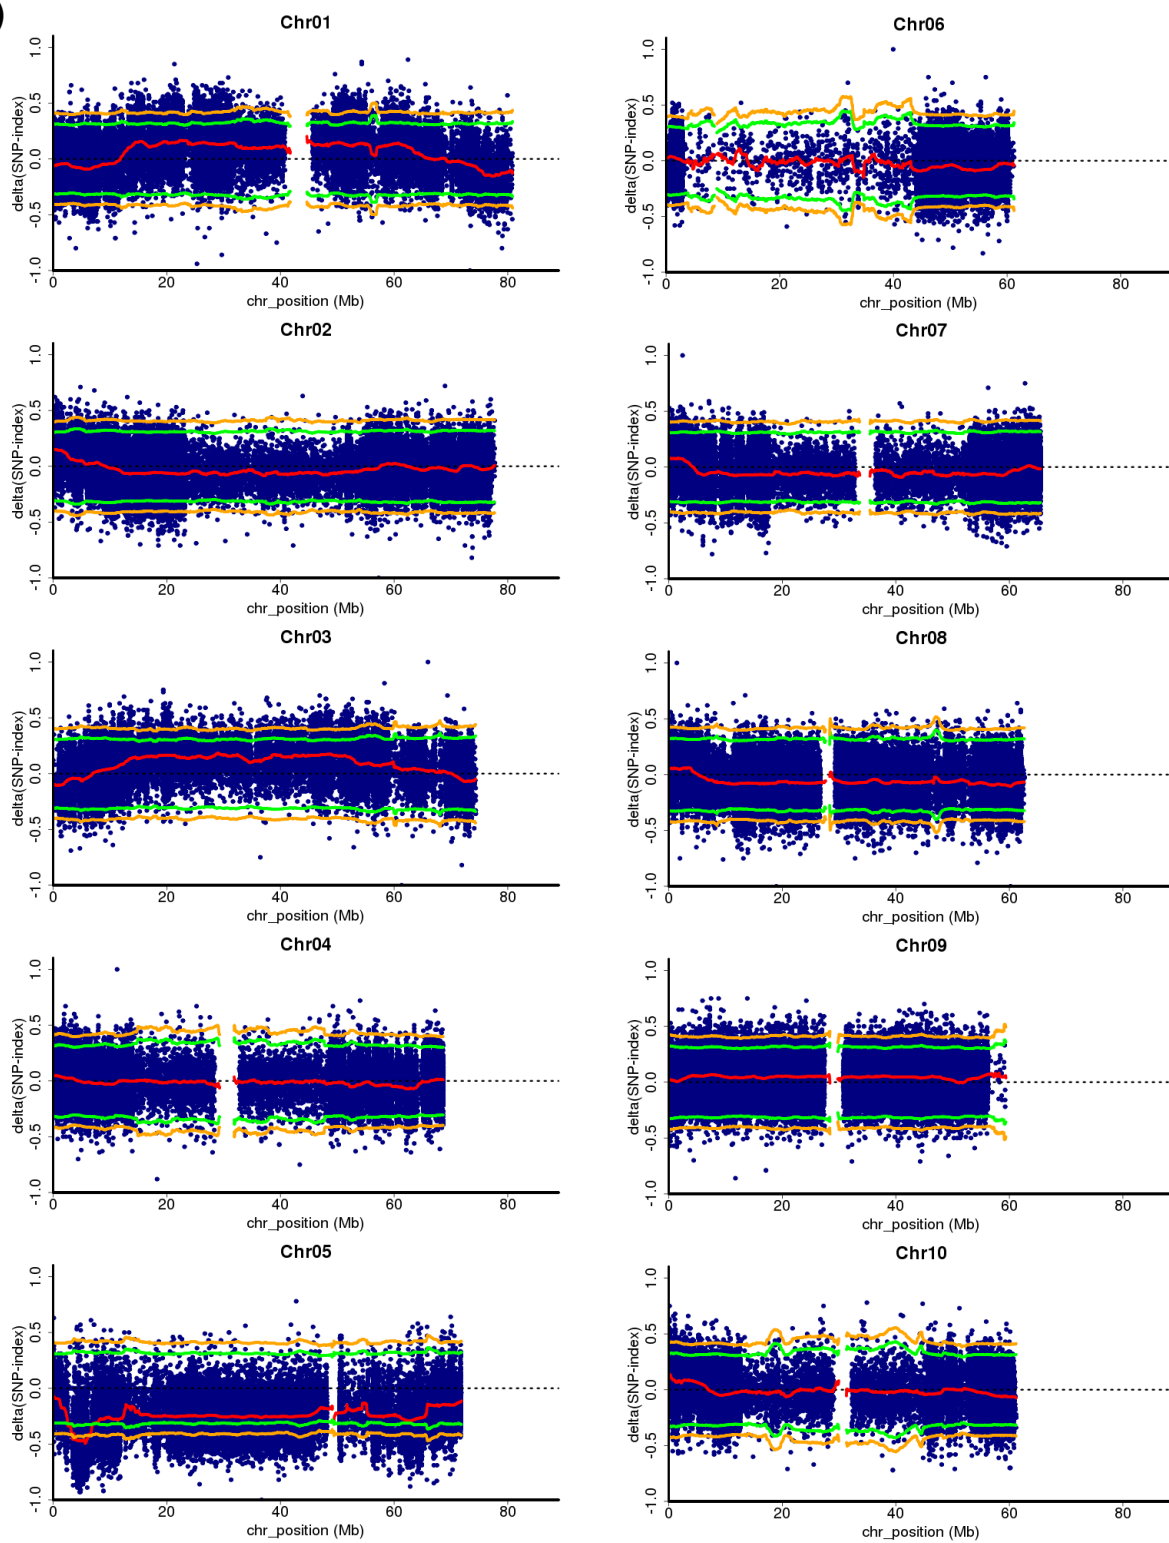

Figure S3

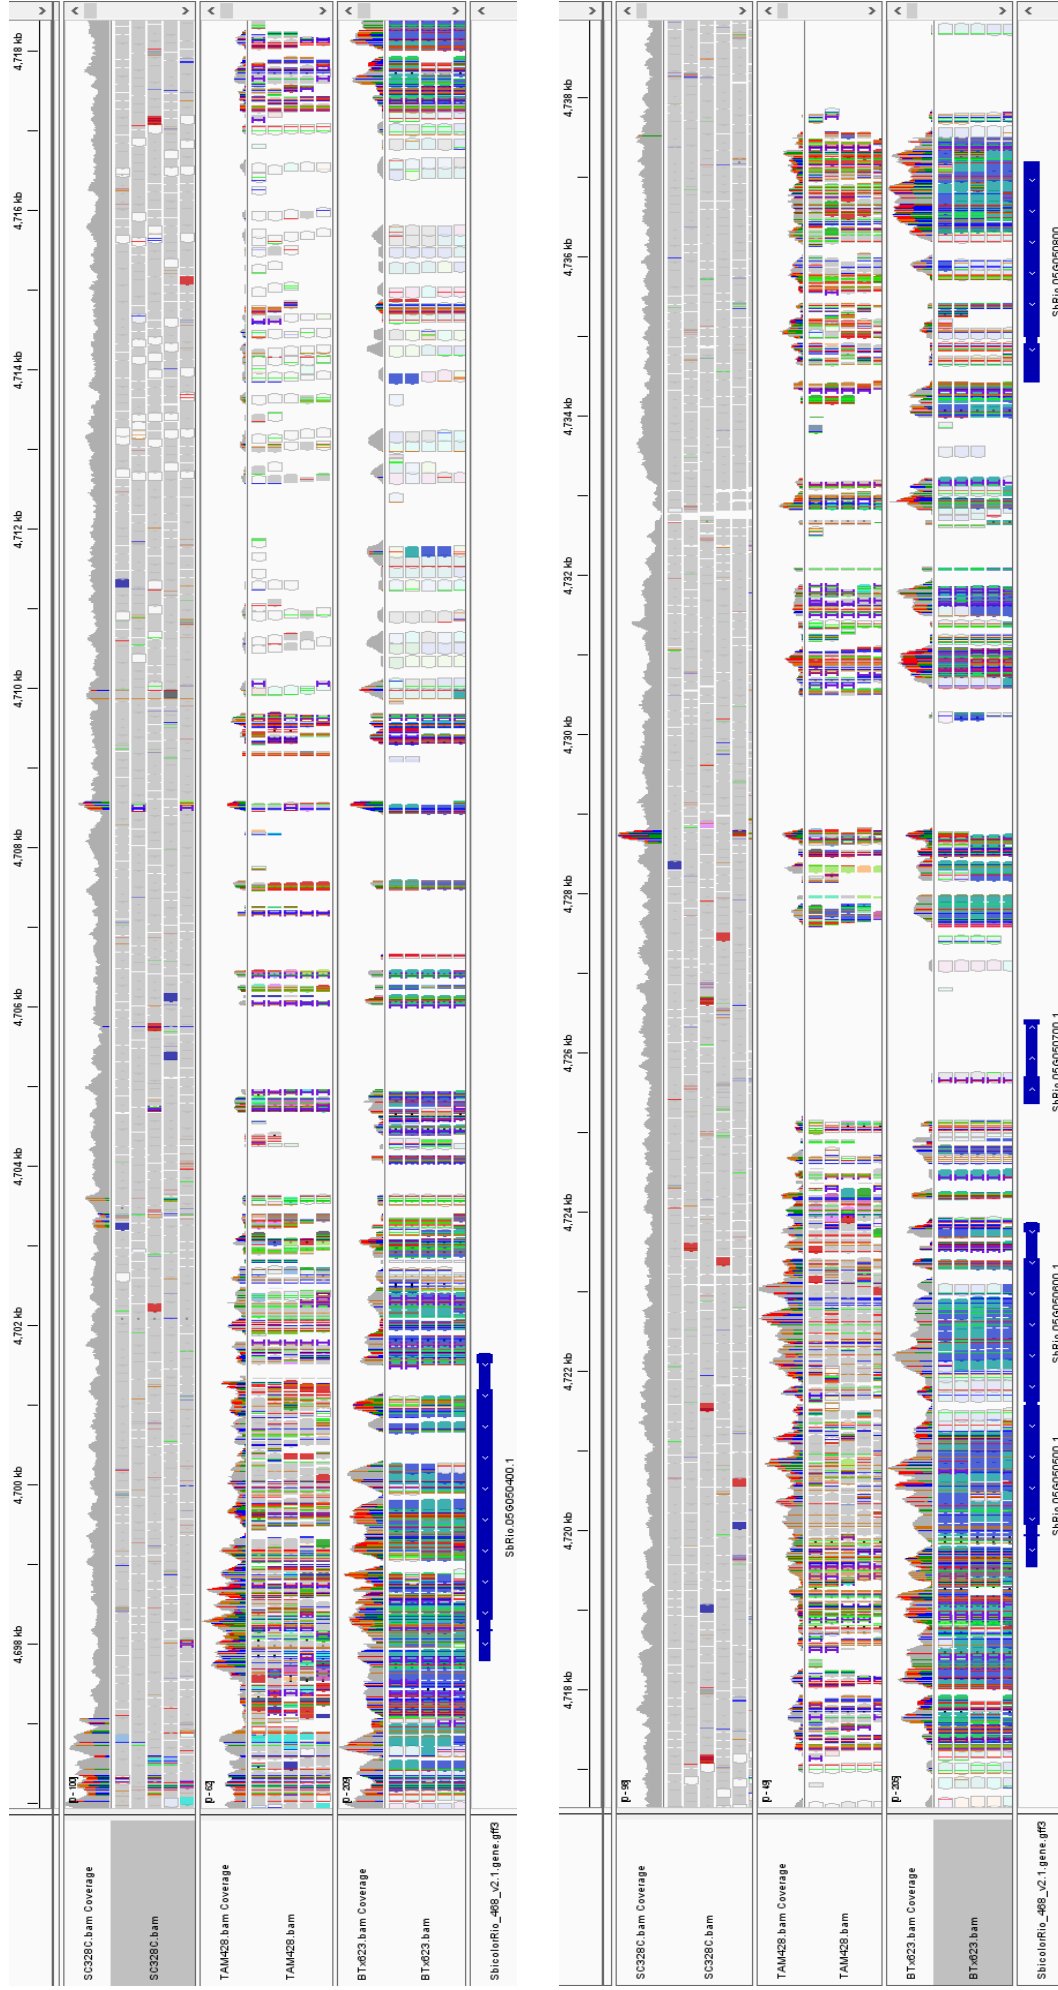

**Figure S4**

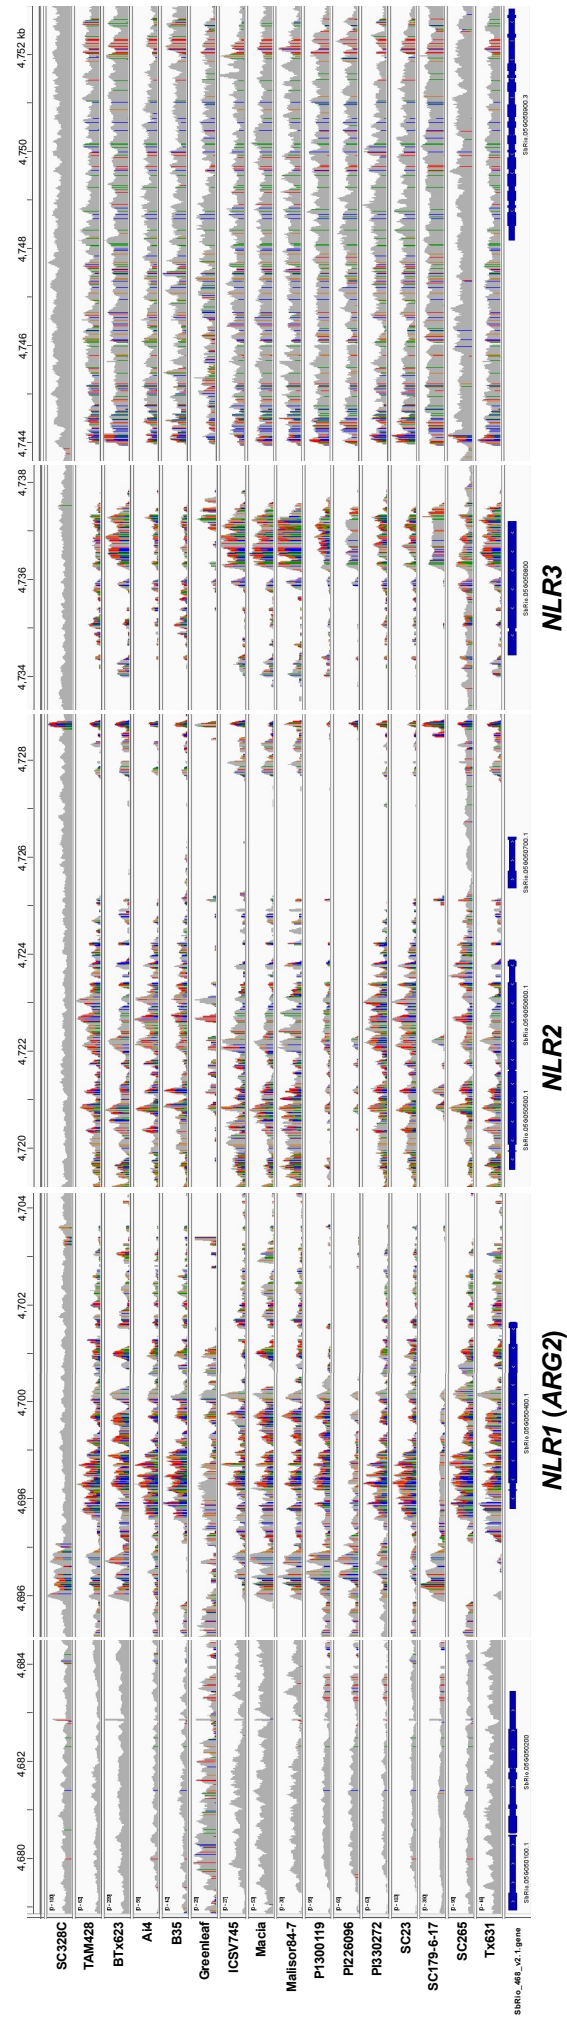

Figure S5

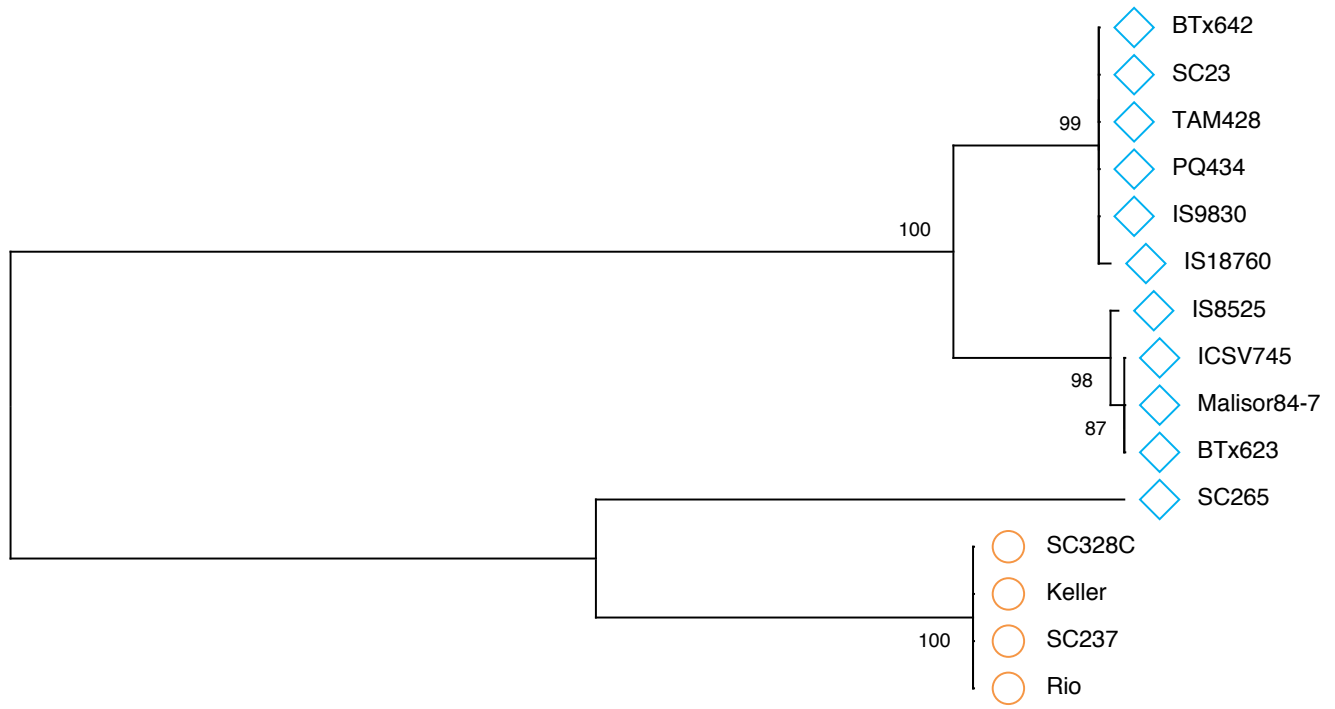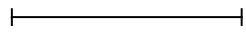

0.02

Figure S6

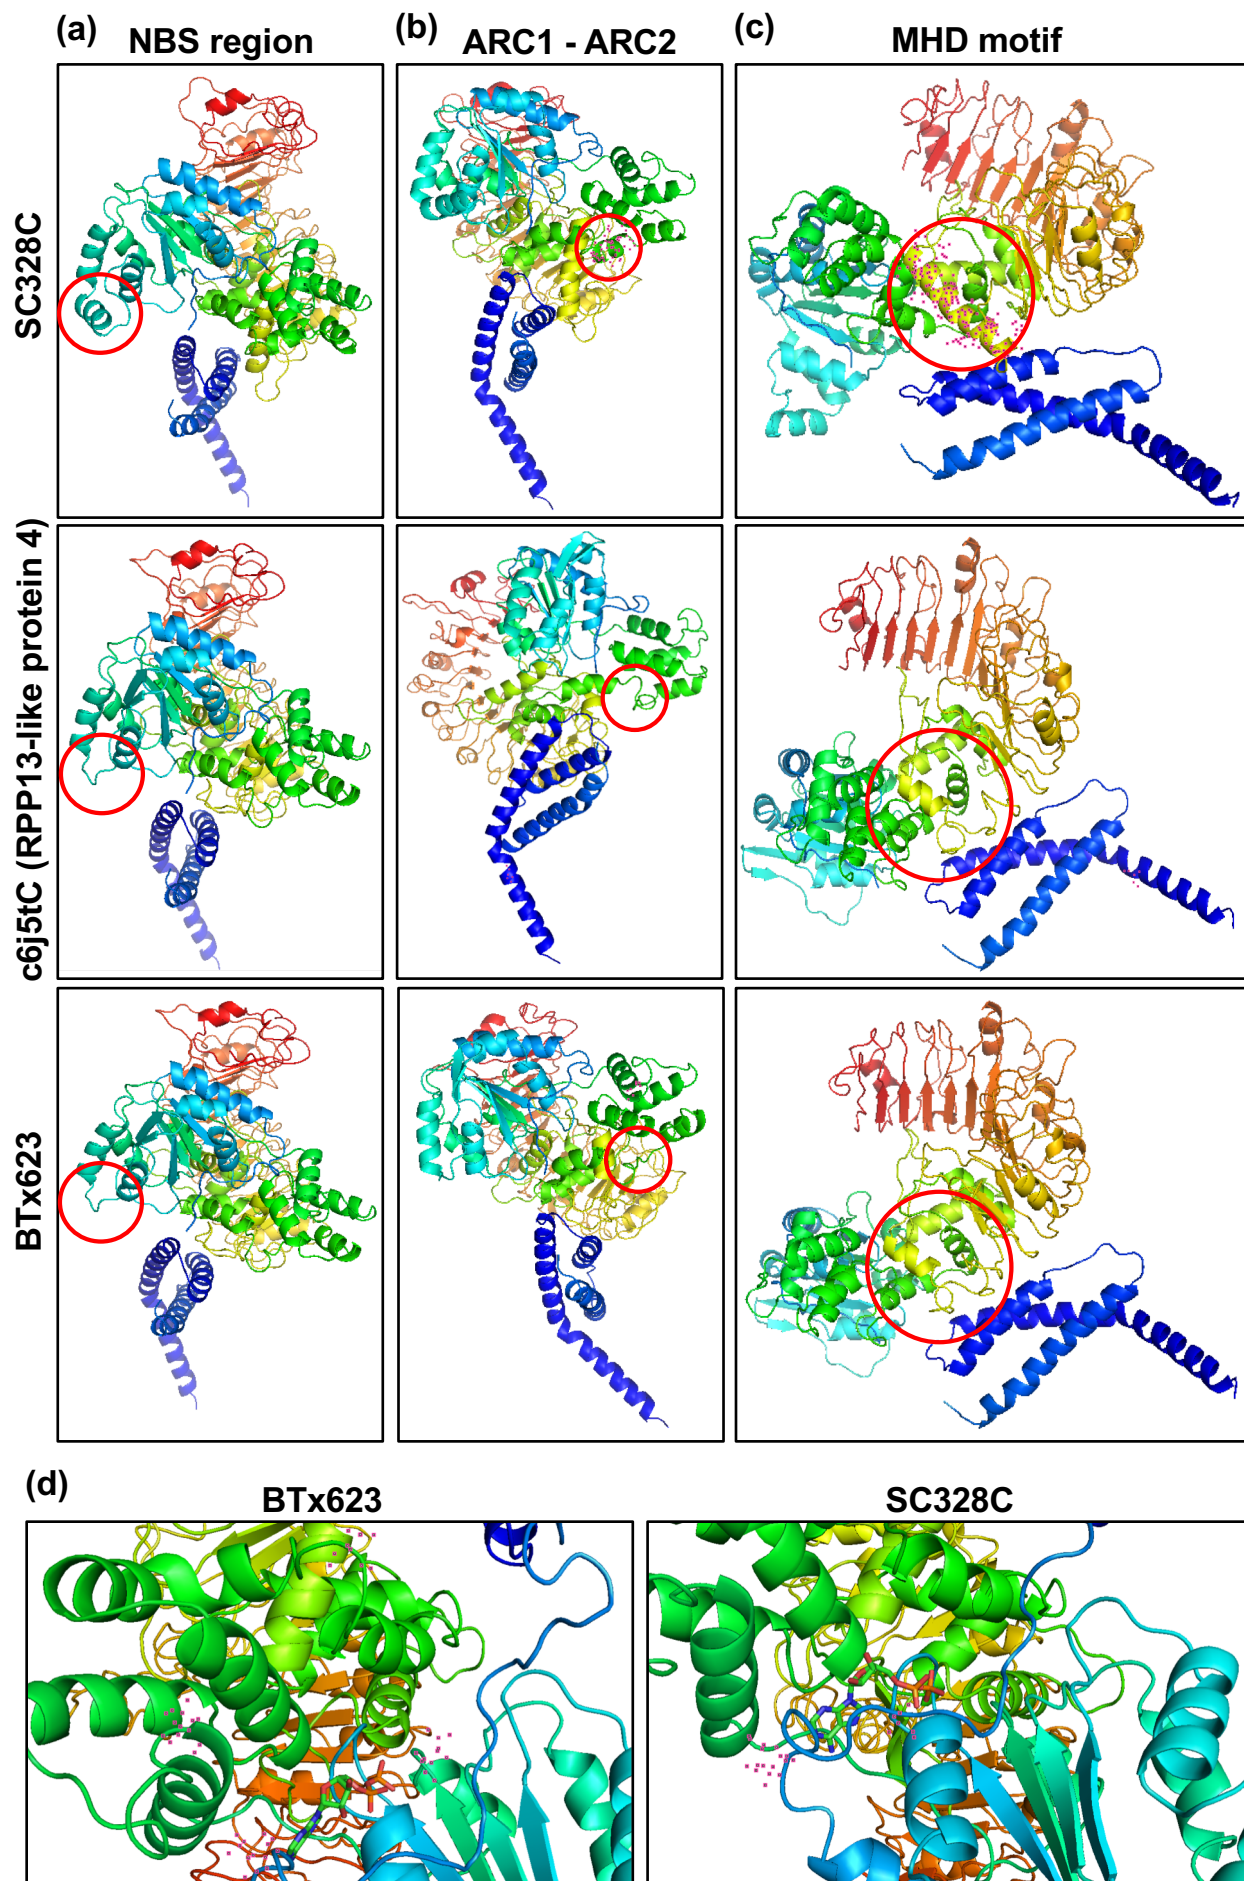

Figure S7

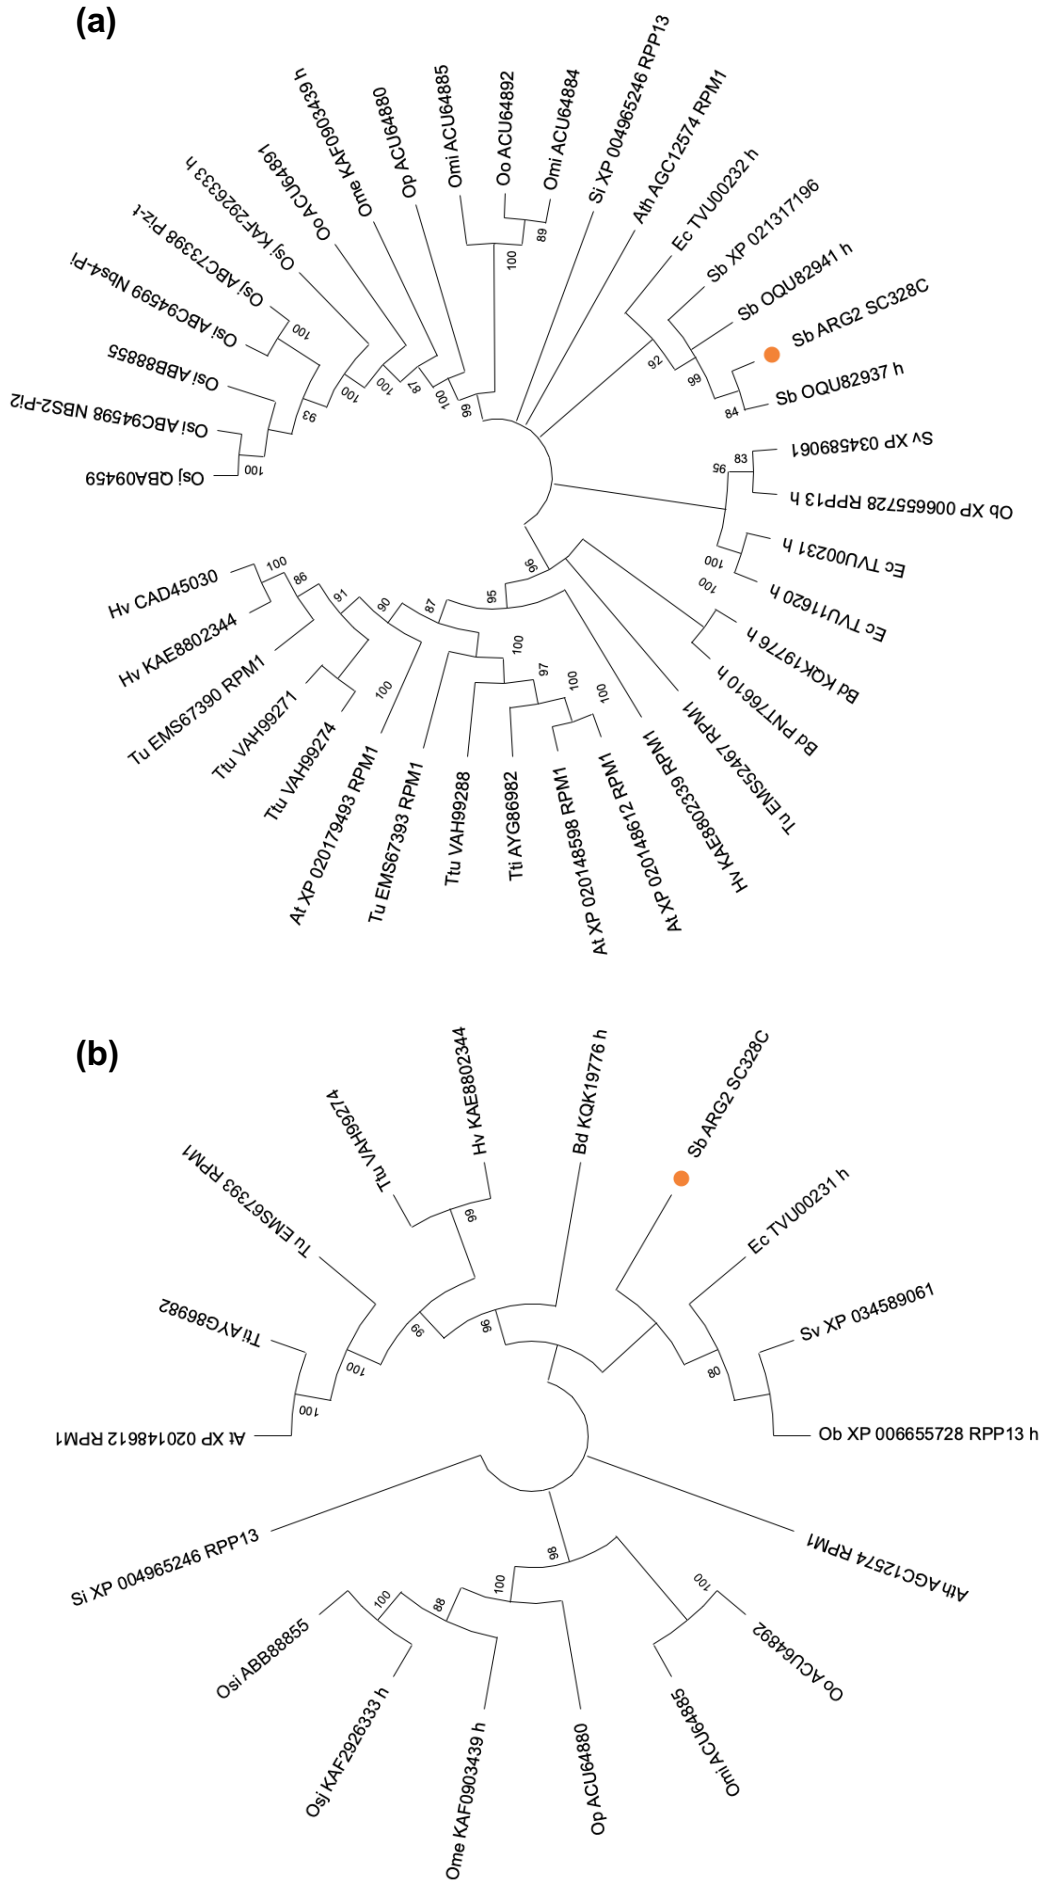





**Figure S9**

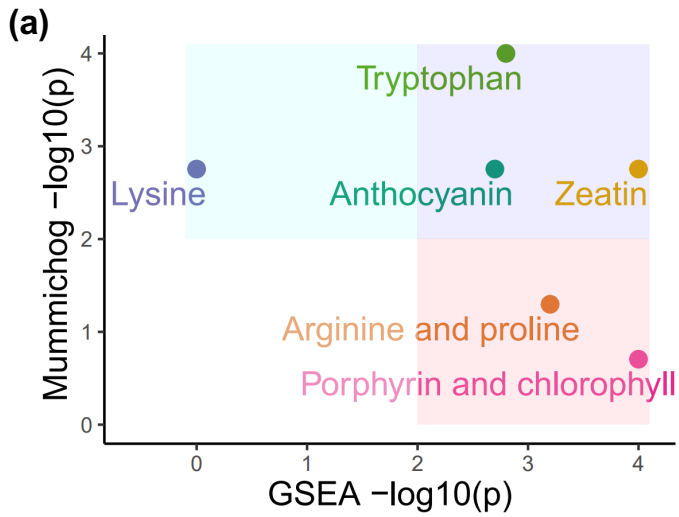

**(b)**

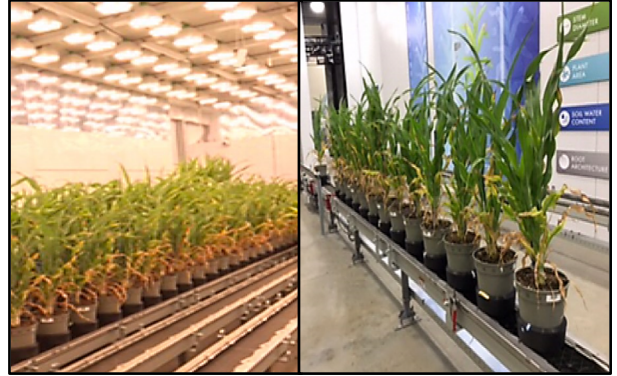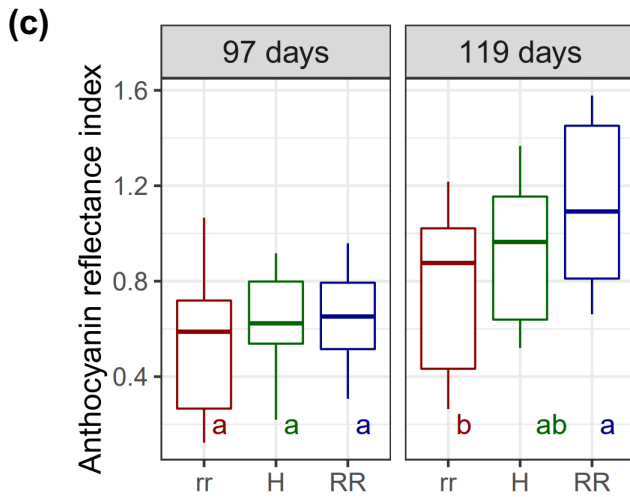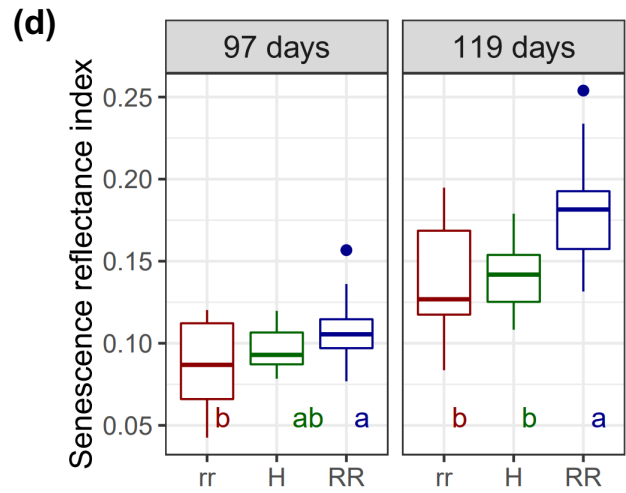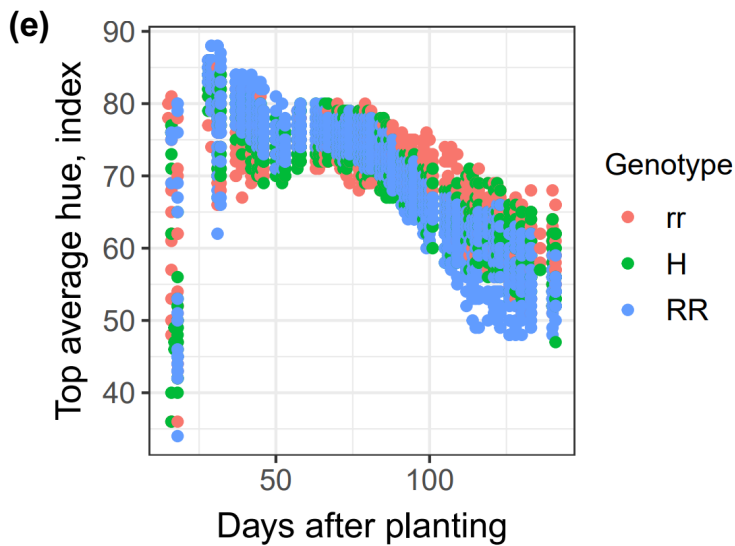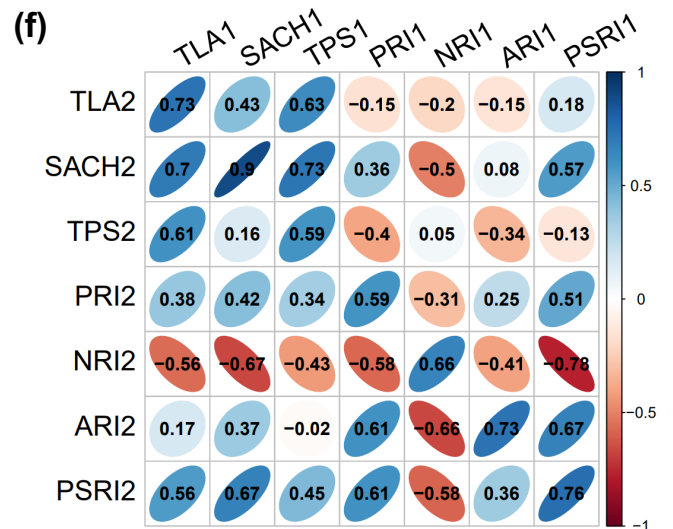

Figure S10

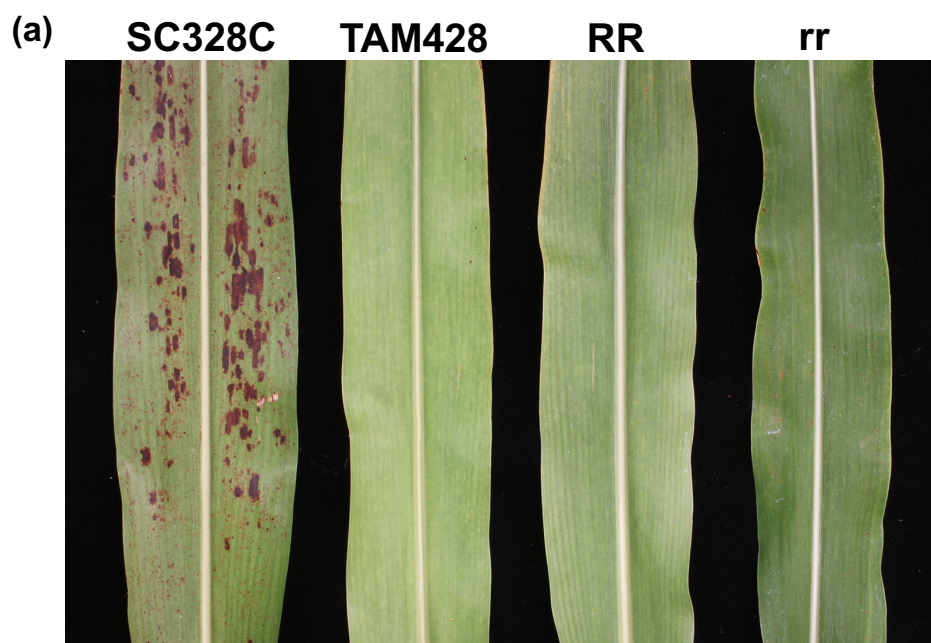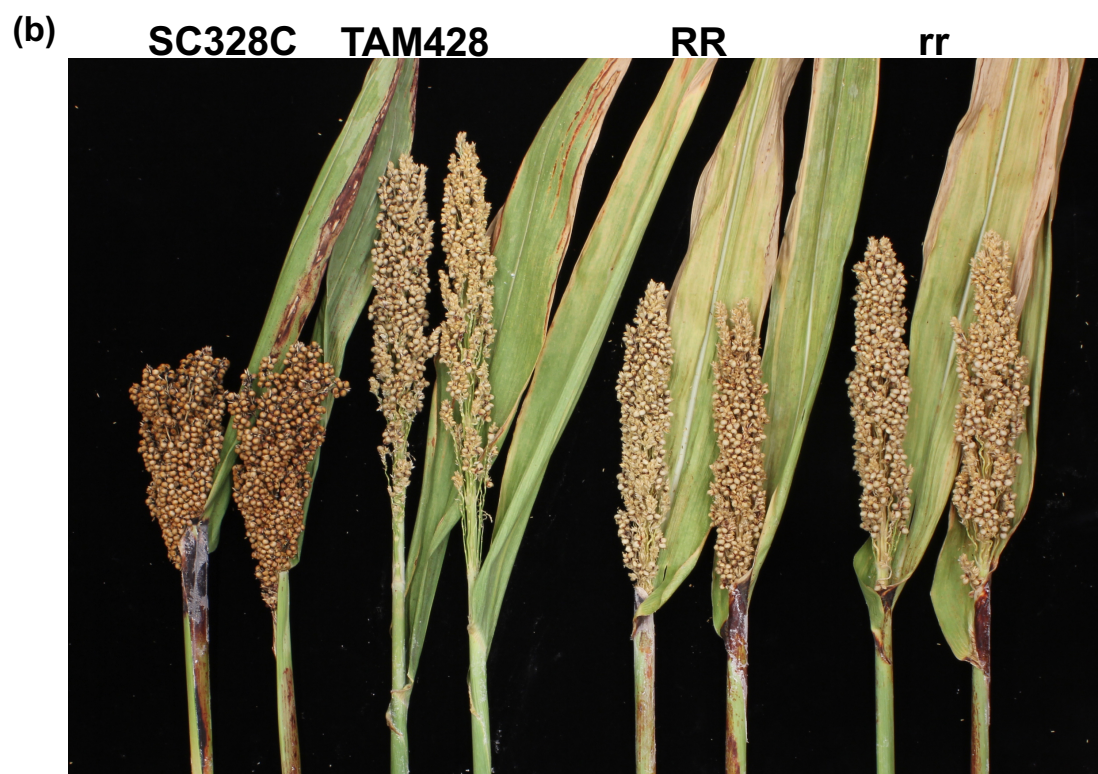

Supplement: TPJ-113-308-s002.pdf [file TPJ-113-308-s002.pdf]
